# Supplementary material
Source: Springer Nature journal article supplement (https://www.springermedizin.de/resource/supplementary/12943_2011_887_MOESM2_ESM.pdf/9551948)

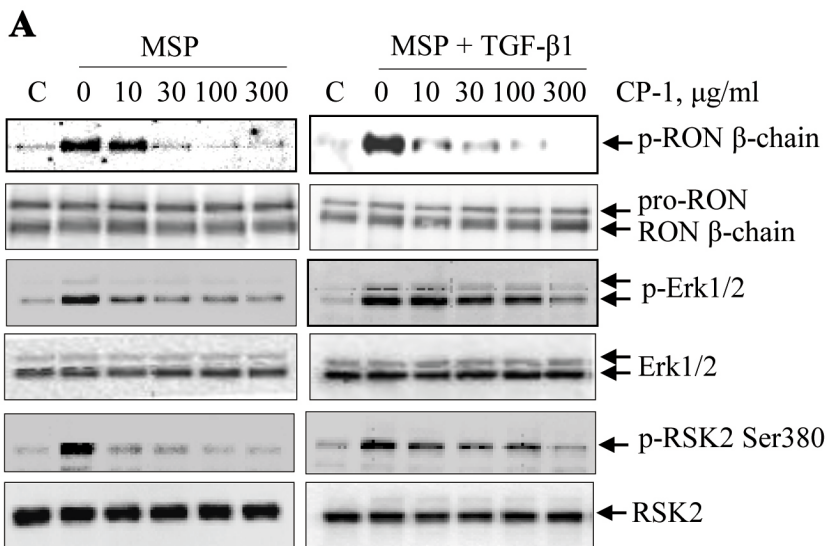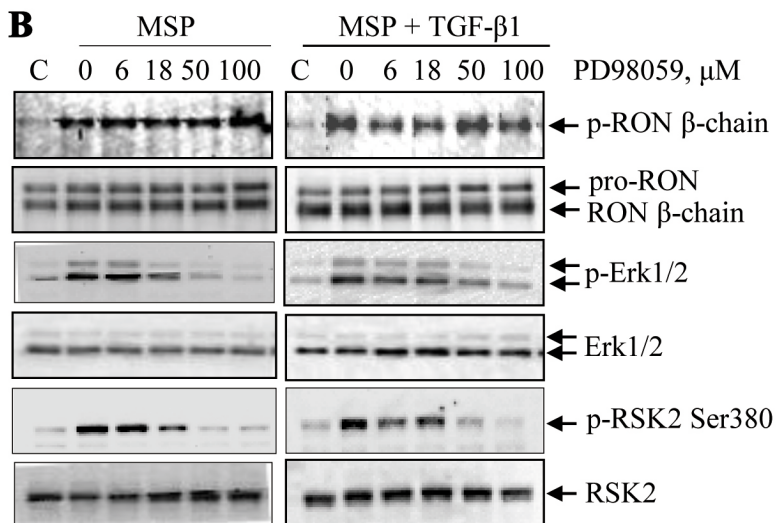

Supplement: MOESM2 [file 9551948]
